# Supplementary material for: Field-relevant doses of the systemic insecticide fipronil and fungicide pyraclostrobin impair mandibular and hypopharyngeal glands in nurse honeybees (Apis mellifera)
Source: PubMed Central journal article supplement (PMC5680249; doi:10.1038/s41598-017-15581-5), 2017-11-09
Supplement: 41598_2017_15581_MOESM1_ESM.pdf [file 41598_2017_15581_MOESM1_ESM.pdf]

**Supplementary Data**

**Field-relevant doses of the systemic insecticide fipronil and fungicide pyraclostrobin impair mandibular and hypopharyngeal glands in nurse honeybees (*Apis mellifera*)**

Rodrigo Zaluski<sup>1</sup>, Luis Antonio Justulin Jr.<sup>2</sup>, Ricardo de Oliveira Orsi<sup>1,\*</sup>

**Affiliations:**

<sup>1</sup>Núcleo de Ensino, Ciência e Tecnologia em Apicultura Racional (NECTAR), São Paulo State University (UNESP), School of Veterinary Medicine and Animal Science, Department of Animal Production, Botucatu, SP, Brazil

<sup>2</sup>São Paulo State University (UNESP), Institute of Biosciences, Department of Morphology, Botucatu, SP, Brazil

**Supplementary Table S1 .....Page 2**

**Supplementary Table S1.** Areas occupied by worker eggs, uncapped brood, and capped brood (cm<sup>2</sup>) in combs in honeybee colonies exposed to pyraclostrobin and fipronil, both individually and combined.

| Days after exposure | Worker eggs      |                  |                  |                  | Uncapped brood   |                  |                  |                  | Capped brood     |                  |                  |                  |
|---------------------|------------------|------------------|------------------|------------------|------------------|------------------|------------------|------------------|------------------|------------------|------------------|------------------|
|                     | Ct               | Pyr              | Fip              | Fip+Pyr          | Ct               | Pyr              | Fip              | Fip+Pyr          | Ct               | Pyr              | Fip              | Fip+Pyr          |
| <b>15</b>           | 216<br>(74-228)  | 212<br>(71-218)  | 200<br>(66-209)  | 188<br>(64-196)  | 312<br>(108-330) | 280<br>(96-322)  | 240<br>(92-296)  | 220<br>(86-260)  | 328<br>(124-366) | 320<br>(98-355)  | 300<br>(64-320)  | 292<br>(70-330)  |
| <b>30</b>           | 232<br>(130-354) | 236<br>(106-320) | 220<br>(86-280)  | 208<br>(86-286)  | 228<br>(126-284) | 220<br>(106-256) | 212<br>(90-239)  | 200<br>(90-216)  | 212<br>(88-248)  | 200<br>(89-216)  | 192<br>(83-206)  | 166<br>(71-190)  |
| <b>45</b>           | 212<br>(118-312) | 220<br>(116-274) | 192<br>(127-254) | 144<br>(106-234) | 212<br>(118-274) | 200<br>(86-285)  | 192<br>(105-246) | 180<br>(82-214)  | 228<br>(145-358) | 216<br>(124-316) | 212<br>(110-284) | 196<br>(94-292)  |
| <b>60</b>           | 264<br>(146-356) | 236<br>(106-317) | 260<br>(100-304) | 240<br>(88-278)  | 284<br>(172-300) | 260<br>(172-290) | 220<br>(168-270) | 212<br>(142-254) | 204<br>(133-274) | 212<br>(125-276) | 196<br>(115-248) | 184<br>(104-208) |
| <b>75</b>           | 212<br>(118-274) | 220<br>(118-276) | 204<br>(108-292) | 184<br>(98-254)  | 244<br>(174-318) | 224<br>(166-314) | 216<br>(168-320) | 204<br>(142-302) | 232<br>(138-372) | 216<br>(102-336) | 240<br>(96-304)  | 220<br>(84-282)  |

No statistically significant differences were detected (Kruskal–Wallis one-way ANOVA on ranks,  $p > 0.05$ ). Data are presented as medians and interquartile intervals (Q1–Q3). Ct: control; Pyr: pyraclostrobin; Fip: fipronil; Fip+Pyr: fipronil + pyraclostrobin.
